# Cysteine String Protein Limits Expression of the Large Conductance, Calcium-Activated K<sup>+</sup> (BK) Channel

Eva Ahrendt<sup>1</sup>, Barry Kyle<sup>2</sup>, Andrew P. Braun<sup>2</sup>, Janice E. A. Braun<sup>1\*</sup>

**1** Department of Physiology and Pharmacology, Hotchkiss Brain Institute, University of Calgary, Calgary, Alberta, Canada, **2** Libin Cardiovascular Institute, Faculty of Medicine, University of Calgary, Calgary, Alberta, Canada

## Abstract

Large-conductance, calcium-activated K<sup>+</sup> (BK) channels are widely distributed throughout the nervous system and play an essential role in regulation of action potential duration and firing frequency, along with neurotransmitter release at the presynaptic terminal. We have previously demonstrated that select mutations in cysteine string protein (CSP $\alpha$ ), a presynaptic J-protein and co-chaperone, increase BK channel expression. This observation raised the possibility that wild-type CSP $\alpha$  normally functions to limit neuronal BK channel expression. Here we show by Western blot analysis of transfected neuroblastoma cells that when BK channels are present at elevated levels, CSP $\alpha$  acts to reduce expression. Moreover, we demonstrate that the accessory subunits, BK $\beta$ 4 and BK $\beta$ 1 do not alter CSP $\alpha$ -mediated reduction of expressed BK $\alpha$  subunits. Structure-function analysis reveals that the N-terminal J-domain of CSP $\alpha$  is critical for the observed regulation of BK channels levels. Finally, we demonstrate that CSP $\alpha$  limits BK current amplitude, while the loss-of-function homologue CSP $\alpha$ <sub>HPD-AAA</sub> increases BK current. Our observations indicate that CSP $\alpha$  has a role in regulating synaptic excitability and neurotransmission by limiting expression of BK channels.

**Citation:** Ahrendt E, Kyle B, Braun AP, Braun JEA (2014) Cysteine String Protein Limits Expression of the Large Conductance, Calcium-Activated K<sup>+</sup> (BK) Channel. PLoS ONE 9(1): e86586. doi:10.1371/journal.pone.0086586

**Editor:** Zhong-Ping Feng, University of Toronto, Canada

**Received:** October 8, 2013; **Accepted:** December 15, 2013; **Published:** January 27, 2014

**Copyright:** © 2014 Ahrendt et al. This is an open-access article distributed under the terms of the Creative Commons Attribution License, which permits unrestricted use, distribution, and reproduction in any medium, provided the original author and source are credited.

**Funding:** This work was funded by an NSERC grant to (JEAB) and an NSERC grant to (APB). The funders had no role in study design, data collection and analysis, decision to publish, or preparation of the manuscript.

**Competing Interests:** The authors have declared that no competing interests exist.

\* E-mail: braunj@ucalgary.ca

## Introduction

Cysteine string protein (CSP $\alpha$ ) is a presynaptic co-chaperone for Hsc70 that protects neurons from degeneration and synaptic loss [1]. CSP $\alpha$  is a synaptic vesicle-associated protein bearing a characteristic J domain, as well as a cysteine rich ‘string’ region [2]. Mutations of CSP $\alpha$  in humans are associated with adult-onset autosomal dominant neuronal ceroid lipofuscinosis (ANCL), which is a progressive neurodegenerative disorder characterized by psychiatric manifestations, seizures, progressive dementia and motor impairment [3–5]. Disruption of the CSP $\alpha$  gene causes impaired presynaptic neurotransmission in *Drosophila melanogaster* [6] and fulminant neurodegeneration in mice [1,7]. In CSP $\alpha$  null mice, synapse loss occurs in an age- [1] and activity-dependent manner [8,9]. The cellular mechanisms that underlie CSP $\alpha$ 's neuroprotective function remain to be established.

Recent work from our group has shown that the large-conductance, calcium-activated K<sup>+</sup> (BK) channel, which plays an important role in neuronal membrane excitability, is markedly increased by disabling mutations of CSP $\alpha$  [10]. Specifically, deletion of CSP $\alpha$  residue 116, replacement of Leu 115 by Arg lead to increased BK channel density in cultured neurons. Moreover, CSP $\alpha$  null mice exhibit 2.5 fold higher BK channel expression compared to wild type mice, whereas the densities of other important cation channels (i.e. Ca<sub>v</sub>2.2, K<sub>v</sub>1.1 and K<sub>v</sub>1.2) do not change. These findings suggest that one particular function of CSP $\alpha$  may be to limit the cellular expression of BK channels.

In the present study, we extend our recent work and characterize the effect of wild type CSP $\alpha$  on BK channel density.

In particular, we have examined the prediction that wild-type CSP $\alpha$  limits the cellular level of BK channels, however, such an effect may only be evident under conditions of elevated BK channel expression. To create such a model system, murine neuroblastoma cells were transfected with murine BK channel cDNA in either the absence or presence of co-transfected wild-type, CSP $\alpha$ , or loss-of-function CSP $\alpha$ <sub>HPD-AAA</sub>. Using this strategy, we observed that CSP $\alpha$  limits BK channel expression in a time- and dose-dependent manner, and that the J domain of CSP $\alpha$  is essential for this regulatory action, as revealed by structure-function analysis. Finally, we show that while CSP $\alpha$  reduces BK channel current, loss-of-function CSP $\alpha$ <sub>HPD-AAA</sub> increases BK current amplitude. These findings thus demonstrate that wild-type CSP $\alpha$  is able to restrict neuronal BK channel expression, and further help to explain why loss of CSP $\alpha$  function, due to genetic mutations, lead to elevated BK density in the CNS.

## Results

### Robust BK Channel Expression is Reduced by CSP $\alpha$

We have recently reported that interference of CSP $\alpha$  activity, either by genetic disruption (i.e. CSP $\alpha$ <sup>-/-</sup> mice) or expression of dysfunctional CSP $\alpha$  in a neuronal cell line, is associated with a significant elevation of BK channel density at the cell surface [10]. The data arising from the experimental strategies designed to disrupt CSP $\alpha$  function strongly suggest that part of CSP $\alpha$ 's normal function in the CNS may be to regulate neuronal BK expression, which would be expected to influence neuronal excitability. We

rationalized that if CSP $\alpha$  truly acts in this capacity, then a strategy involving elevated expression of wild-type CSP $\alpha$  would predictably lead to a decrease in BK channel levels, and provide direct insights into the cellular actions of wild-type CSP $\alpha$ . To test this hypothesis, we utilized a transient transfection strategy in order to express murine brain BK channel  $\alpha$  subunits at a high level, thereby providing a robust baseline signal from which one could reliably detect hypothesized decreases in BK channel levels in the presence of increasing amounts of wild-type CSP $\alpha$ . As shown in Figure 1A, co-expression of murine brain BK $\alpha$  subunits (Butler et al, 1993) in native CAD cells with increasing amounts of myc-tagged, wild-type CSP $\alpha$  led to a dose-dependent decrease in the cellular level of BK $\alpha$  subunit protein, which correlated with increasing cellular expression of CSP $\alpha$ . Whereas co-transfection of cells with a low amount of CSP $\alpha$  cDNA (i.e. 0.25  $\mu$ g) had no significant effect on BK $\alpha$  channel expression at 24 hour post-transfection, addition of either 0.5  $\mu$ g or 0.75  $\mu$ g CSP $\alpha$  cDNA significantly reduced the level of BK $\alpha$  protein. Figure 1B displays quantification of the CSP $\alpha$ -dependent changes in BK $\alpha$  subunit expression; data are normalized to the level of BK $\alpha$  subunit in the presence of empty pCMV expression vector, which served as the co-transfection control. These experiments revealed that wild-type CSP $\alpha$  is capable of decreasing BK channel density in a dose-dependent manner.

We next examined the time dependence of the observed CSP $\alpha$ -mediated regulation of BK channel expression. Figures 1C&D show that the extent of CSP $\alpha$ -mediated decrease in BK $\alpha$  subunit expression was greater at 48 hours post-transfection using either 0.25 or 0.75  $\mu$ g CSP $\alpha$  cDNA compared with the expression observed at 24 hours. The greater effect of CSP $\alpha$  on BK channel expression at 48 hours was not due to enhanced expression of CSP $\alpha$  at the 48 versus 24 hour time point, as shown by anti-myc detection (Figure 1C). To quantify the greater effect of CSP $\alpha$  at 48 hours, we compared BK channel expression at this time point with the expression at 24 hours, which was first normalized to 100% for both 0.25 and 0.75  $\mu$ g CSP $\alpha$  transfection conditions (Figure 1D). With a higher level of CSP $\alpha$  expression (i.e. 0.75 vs 0.25  $\mu$ g), a more substantial decrease in BK channel expression at the 48 hour time point was noted. No CSP $\alpha$ -mediated changes were detected in cellular level of  $\beta$ -actin and co-transfection with the pCMV vector alone did not result in any time-dependent alteration of BK channel density. The data displayed in Figure 1 further illustrate the 3 distinct species of wild-type CSP $\alpha$  that can be identified by Western blot; a 26 kDa immature form, a 34 kDa mature palmitoylated protein and a 70 kDa CSP $\alpha$  dimer, as described previously [11,12]. Taken together, these findings show that the wild-type CSP $\alpha$  is able to lower BK $\alpha$  subunit expression in a dose- and time-dependent manner.

Physiologically, BK $\alpha$  subunits co-assemble into a tetrameric complex with a single, ion conducting pore structure that is subject to regulation by auxiliary  $\beta$ -subunits. Since chaperones typically regulate the assembly and/or disassembly of protein complexes (e.g. DnaJC6 mediates clathrin disassembly [13]), we investigated the possibility that the presence of auxiliary BK $\beta$ -subunits may alter the observed CSP $\alpha$ -mediated regulation of BK channel expression. As shown in Figure 2, co-expression of the BK channel auxiliary subunits, BK $\beta$ 4 (panel A) or BK $\beta$ 1 (panel B), did not influence the CSP $\alpha$ -mediated decrease in BK channel levels in transfected CAD cells. Co-expression of CSP $\alpha$  still reduced BK channel levels in the presence of BK $\beta$ 1 or BK $\beta$ 4, compared to vector control. Interestingly, CSP $\alpha$  did not noticeably alter the expression of either BK $\beta$ 1 or BK $\beta$ 4 (Fig. 2A and B, middle panels). In CAD cells transfected with BK $\alpha$  cDNA in either the absence or presence of CSP $\alpha$ , we further observed that the

expression levels of several endogenous membrane proteins (i.e. SNAP25, syntaxin1A and GAP43) were not altered (Figure 2E). Moreover, we found that co-transfected CSP $\alpha$  does not alter the expression of the membrane proteins syntaxin 1A or the TRPC6 channel isoform following their transient expression in CAD cells (Figure 2F). Collectively, these results indicate that BK $\beta$ 1 and BK $\beta$ 4 do not influence the regulation of BK channel expression by CSP $\alpha$  and that CSP $\alpha$  selectively reduces BK $\alpha$  subunit expression, but not that of either BK $\beta$ 1 or BK $\beta$ 4 or a number of other membrane proteins.

### The J Domain is Essential for CSP $\alpha$ -mediated Reduction in BK $\alpha$ Channels

To elucidate the structural elements within CSP $\alpha$  responsible for its regulation of BK channel expression, a series of CSP $\alpha$  deletion mutants were constructed and co-transfected with BK $\alpha$  subunit cDNA in CAD cells. The myc-tagged CSP $\alpha$  constructs are shown schematically in Figure 3A, and each cDNA construct generated a protein that migrated at the expected molecular weight when analyzed by SDS PAGE and western blotting (Fig. 3B). Experimentally, all C-terminal truncations of CSP $\alpha$  were still capable of decreasing BK channel expression following co-transfection. CSP $\alpha$ <sub>1-90</sub> and CSP $\alpha$ <sub>1-100</sub> reduced BK channel expression to levels of 41.9 $\pm$ 10.9% and 48.1 $\pm$ 9.5% of control, respectively, and larger reductions in channel expression were observed in the presence of CSP $\alpha$ <sub>1-82</sub> (15.1 $\pm$ 8.2% of control) and CSP $\alpha$ <sub>1-112</sub> (16.5 $\pm$ 8.6% of control), relative to cells co-transfected with the pCMV vector (Fig. 3C). These findings indicate that the N-terminal region of CSP $\alpha$ , which contains the J domain, is sufficient for the observed regulation of BK channel expression by wild-type CSP $\alpha$ . This conclusion was further confirmed by examining N-terminal truncations of CSP $\alpha$  lacking the J domain. Neither CSP $\alpha$ <sub>113-198</sub> (97.3 $\pm$ 30.5%) nor CSP $\alpha$ <sub>137-198</sub> (87.3 $\pm$ 7.6%) had a significant effect on BK channel expression (Fig. 3C), emphasizing the importance of the N-terminal region of CSP $\alpha$  for the regulation of BK channel expression. As expected, multiple bands are observed for CSP $\alpha$ <sub>113-198</sub> which includes the cysteine string region, while a single immunoreactive band was detected for CSP $\alpha$ <sub>137-198</sub> which does not include the cysteine string region. We have previously demonstrated that residues 83–136, encoding the linker region and cysteine string region are required for CSP $\alpha$  oligomerization [11] as exemplified in the right hand side of Figure 3B. Interestingly, deletion of the cysteine string region (CSP $\alpha$  <sub>$\Delta$ C</sub>) did not preclude the ability of CSP $\alpha$  to reduce BK channel expression (18.8 $\pm$ 7.0%).

Several neuronal proteins contain a J-domain [14], which represents the signature motif of all members of the J protein family. Given the functional importance of the J-domain for CSP $\alpha$ 's observed regulation of BK channel levels, we asked whether J-domains from related chaperones were sufficiently conserved to substitute in this process. To address this question, we generated chimeras of CSP $\alpha$  in which the native J-domain was replaced by the J-domain from another J protein chaperone. The resulting chimeric constructs, shown schematically in Figure 4A, consist of a CSP $\alpha$  background and a substituted J-domain obtained from Hsp40 (DnajB1), Rdj2 (DnajA2) and Rme8 (DnajC13), which display 52%, 52% and 44% amino acid identity, respectively, with the J-domain of CSP $\alpha$  (rat isoform). Western blot analysis demonstrated that co-transfection with individual CSP $\alpha$ /J-domain chimeras decreased BK channel expression compared to the pCMV vector (Figure 4B). Quantification of these effects revealed that the CSP $\alpha$  chimeras - CSP $\alpha$ JD<sub>Hsp40</sub> (17.0 $\pm$ 3.7%), CSP $\alpha$ JD<sub>Rdj2</sub> (23.8 $\pm$ 2.0%) and CSP $\alpha$ JD<sub>Rme8</sub> (17.5 $\pm$ 9.8%), along with wild-type CSP $\alpha$

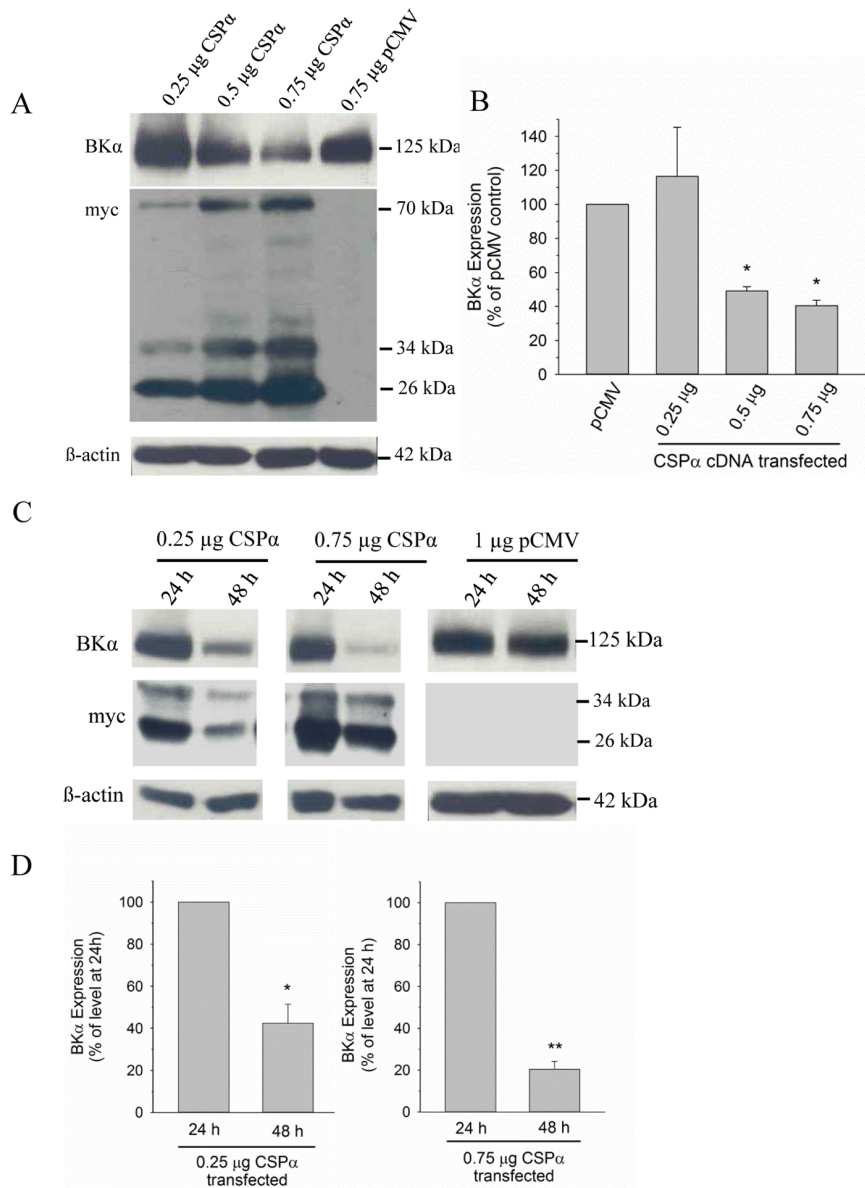

**Figure 1. CSP $\alpha$  alters BK channel expression.** **A.** Native CAD cells were transiently transfected with 1  $\mu$ g cDNA encoding a neuronal BK $\alpha$  subunit, along with different amounts of myc-tagged CSP $\alpha$  (0.25  $\mu$ g, 0.5  $\mu$ g and 0.75  $\mu$ g). Empty pCMV expression vector (0.75  $\mu$ g) was co-transfected with 1  $\mu$ g BK $\alpha$  subunit cDNA as a transfection control. 24 h post-transfection, the cells were lysed and the expression of BK $\alpha$  subunit and myc-tagged protein was analyzed by Western Blot.  $\beta$ -actin detection is shown to verify comparable sample loading. **B.** Histogram depicting quantification of BK $\alpha$  subunit levels in CAD cells co-transfected with increasing amounts of CSP $\alpha$  cDNA. Data are presented as mean  $\pm$  SE of 5 similar experiments; \* $p$ <0.05 vs. pCMV vector control. **C.** Cells were transfected with 1  $\mu$ g cDNA encoding BK $\alpha$  subunit along with either 0.25  $\mu$ g or 0.75  $\mu$ g of myc-tagged CSP $\alpha$  or 1  $\mu$ g of pCMV. 24 h and 48 h post-transfection, BK $\alpha$  subunit expression was analyzed by Western Blot. **D.** Histograms depicting quantification of immunoreactive BK $\alpha$  subunit observed in the presence of co-transfected CSP $\alpha$ , as displayed in panel C. BK $\alpha$  subunit immunoreactivity detected at 48 h is expressed relative to the level of BK $\alpha$  subunit observed at 24 h; data are presented as mean  $\pm$  SE of 4 similar experiments. Statistical significance was determined using one way ANOVA, \* $p$ <0.05; \*\* $p$ <0.01. doi:10.1371/journal.pone.0086586.g001

(22.6 $\pm$ 3.4%) and the truncation mutant CSP $\alpha_{1-82}$  (17.4 $\pm$ 8.1%), all produced a statistically significant and comparable reduction in BK channel expression. As depicted in Figure 4B, all three CSP $\alpha$  chimeric constructs expressed to a similar level compared with wild-type CSP $\alpha$ , and three distinct molecular species of wild-type and chimeric CSP $\alpha$  isoforms (i.e. 26 kDa, 34 kDa and 70 kDa) were readily identified by Western blot, regardless of the substituted J-domain. (Note that the CSP $\alpha_{1-82}$  construct was not detected on this blot, due to its rapid migration during SDS-

PAGE. However, it is evident from Figure 3B that this construct expresses well under our experimental conditions). As displayed in preceding figures,  $\beta$ -actin staining was utilized to ensure similar protein loading for the various cell lysates. Based on these data, it appears that the J-domain of CSP $\alpha$  is necessary for the regulation of BK channel expression and that individual J-domains from related J protein family members can functionally substitute for the native J-domain in CSP $\alpha$ .

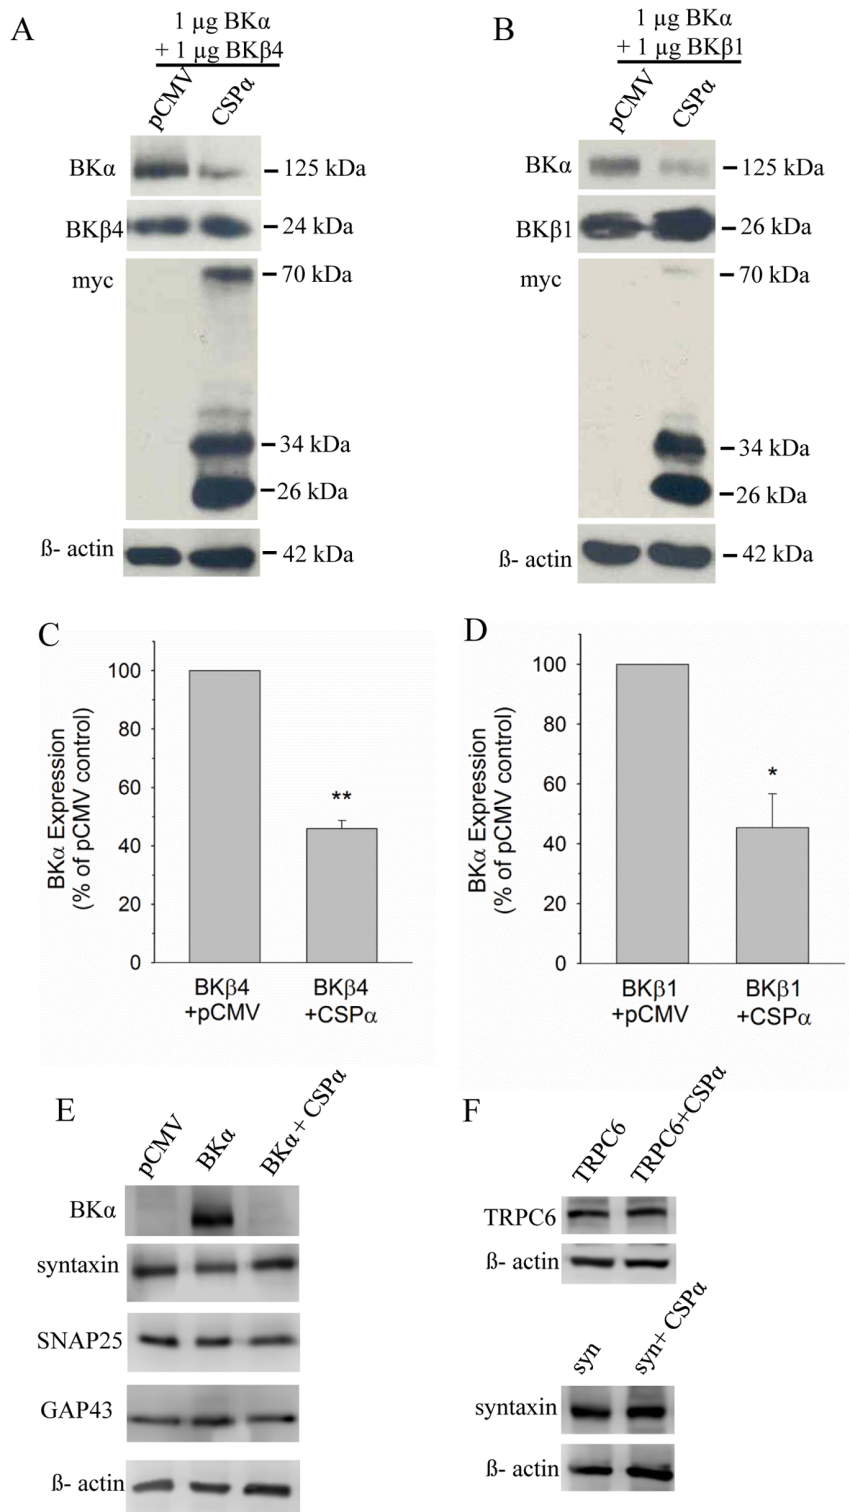

**Figure 2. BK channel  $\beta$ -subunits (BK $\beta$ 4 and BK $\beta$ 1) do not alter the CSP $\alpha$ -mediated reduction in BK channel expression.** CAD cells were transiently transfected with 1  $\mu$ g BK $\alpha$  subunit cDNA plus 1  $\mu$ g BK $\beta$ 4 subunit cDNA (**A**) or 1  $\mu$ g BK $\beta$ 1 subunit cDNA (**B**), along with either 0.75  $\mu$ g CSP $\alpha$  or pCMV vector (control). 24 h post-transfection, protein expression was analyzed by Western Blot with primary antibodies recognizing BK $\alpha$  subunit, BK $\beta$ 4 subunit, BK $\beta$ 1 subunit, myc epitope tag, and  $\beta$ -actin. **C** and **D**, Quantification of BK $\alpha$  subunit expression in CAD cells in the absence or presence of co-transfected CSP $\alpha$ , along with the presence of either BK $\beta$ 4 (panel C) or BK $\beta$ 1 (panel D). **E** CAD cells were transfected with cDNAs encoding pCMV vector alone, BK $\alpha$  subunit or BK $\alpha$  subunit+CSP $\alpha$  and the indicated proteins were evaluated by Western blot analysis. **F** CAD cells were transfected with TRPC6 channel or syntaxin1A cDNA in either the absence or presence of CSP $\alpha$  cDNA. Detection of  $\beta$ -actin was utilized to verify equal protein sample loading. Data are presented as mean  $\pm$  SE of 3 similar experiments; statistical significance was determined using one way ANOVA, \* $p$ <0.05; \*\* $p$ <0.01. Data shown in E and F are representative of 4 independent experiments.  
doi:10.1371/journal.pone.0086586.g002

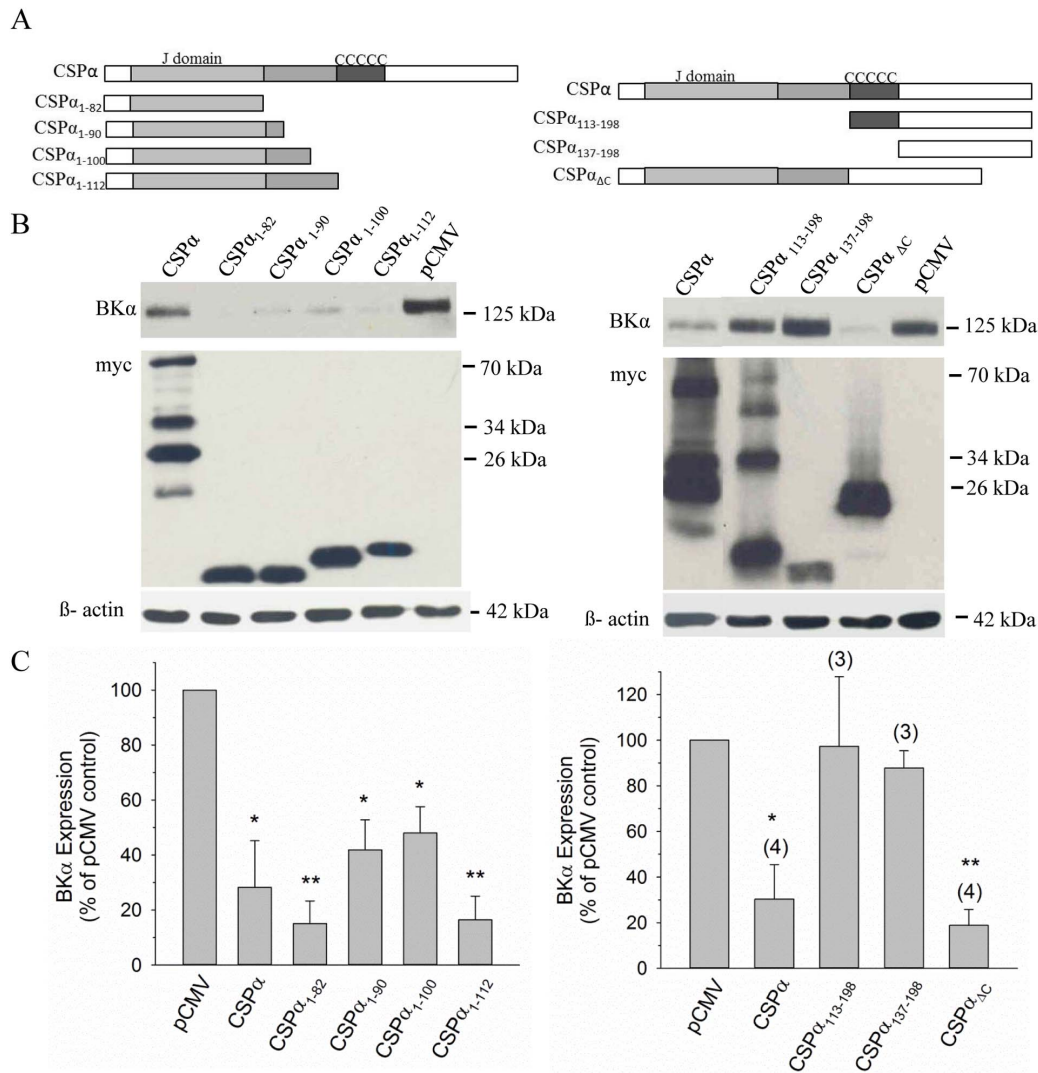

**Figure 3. The J domain of CSP $\alpha$  reduces BK channel expression.** **A.** Schematic of myc-tagged full length CSP $\alpha$  and CSP $\alpha$  deletion constructs. **B.** Western blot analysis of BK channel expression in CAD cells 24 h post-transfection with 1  $\mu$ g cDNA encoding BK $\alpha$  subunit along with 0.75  $\mu$ g myc-tagged full length CSP $\alpha$  cDNA or the indicated deletion constructs. As a transfection control, 0.75  $\mu$ g empty pCMV was co-transfected with BK $\alpha$  subunit cDNA. 30  $\mu$ g of cell lysate isolated under each experimental condition was separated by SDS-PAGE, probed with an anti-BK $\alpha$  subunit antibody and an anti-myc antibody. The histograms in panel **C** quantify changes in BK channel expression in the presence of wild-type CSP $\alpha$  and individual CSP $\alpha$  deletion mutants. Statistically significant differences from the pCMV control (set to 100%) were determined by one-way ANOVA; \* $p < 0.05$ ; \*\* $p < 0.001$ . doi:10.1371/journal.pone.0086586.g003

Hsc70 is a critical interacting partner of CSP $\alpha$ , and displays a low basal ATPase activity that is activated following interaction with the J-domain of CSP $\alpha$  [15]. We examined the possibility that over-expression of Hsc70 alone may be able to independently evoke a reduction in BK channel levels, similar to that observed for CSP $\alpha$ . CAD cells were transiently co-transfected with cDNA encoding the BK $\alpha$  subunit, along with either HA-tagged, wild-type Hsc70, the HA-tagged ATPase domain of Hsc70, which displays constitutive activity [15] or pCMV vector (negative control). Figure 5 demonstrates that no significant changes in BK channel expression were observed when either full length Hsc70 ( $132.9 \pm 30.3\%$ ) or the active ATPase domain (i.e. Hsc70<sub>1-386</sub>) of Hsc70 ( $69.7 \pm 18.9\%$ ) was co-expressed with the BK $\alpha$  subunit, compared with pCMV vector alone. These data indicate that increased cellular levels of Hsc70 are not sufficient to regulate BK

channel expression and that activation of Hsc70 by CSP $\alpha$  is likely required. Our observations are thus similar to those described by Walker and colleagues, who reported that DnaJA1, DnaJA2 and DnaJA4 reduced hERG channel maturation, whereas over-expression of Hsc70 alone had no effect on maturation events [16].

### BK Channel Current Density is Decreased by CSP $\alpha$

To determine whether the observed CSP $\alpha$ -mediated decrease in the cellular BK $\alpha$  protein level also reflected a reduction in functional BK channels at the cell surface, we carried out single cell patch clamp recordings of CAD cells transiently transfected with BK $\alpha$  subunit cDNA in the absence or presence of CSP $\alpha$  cDNA. Co-transfection of GFP under all conditions was utilized as a marker to identify transfected cells. Figure 6A shows representative current families recorded from transfected CAD cells

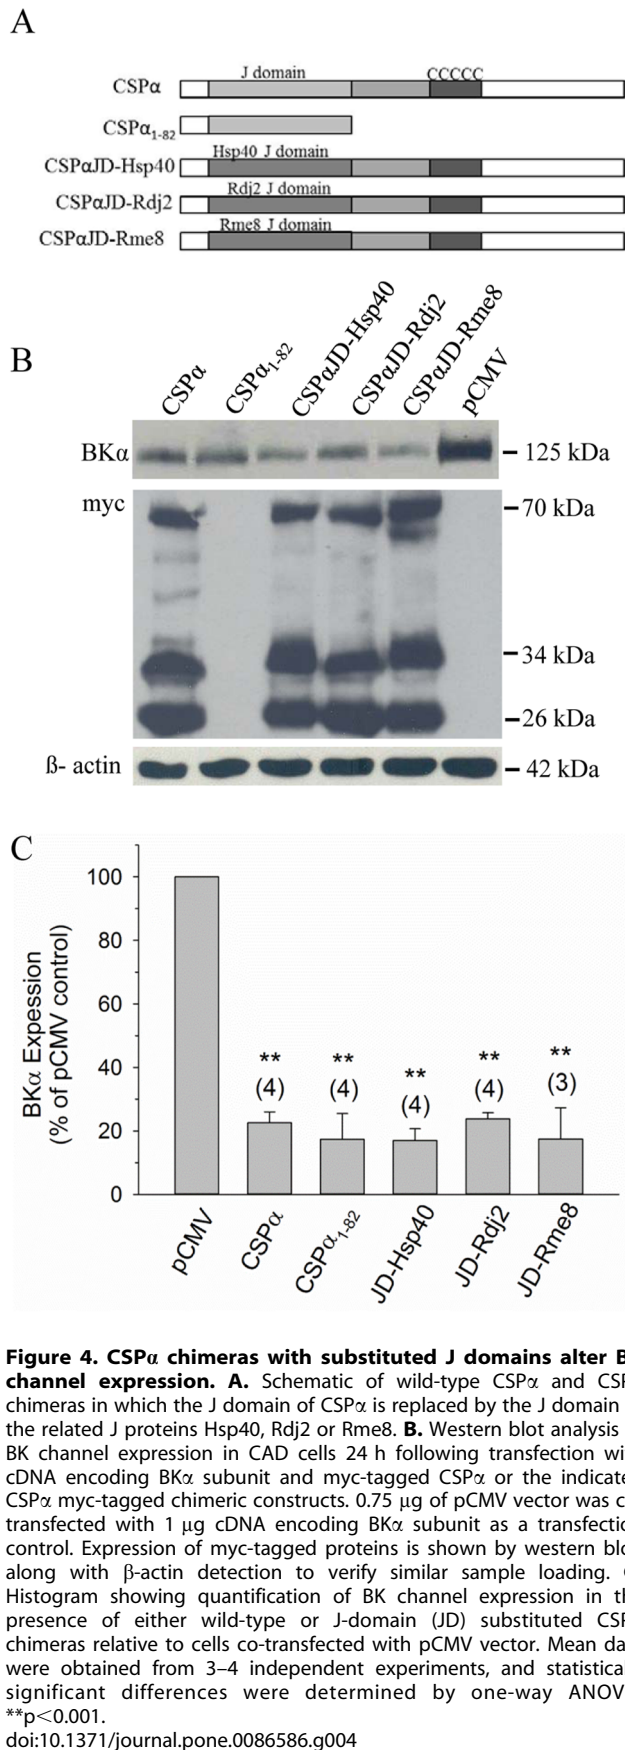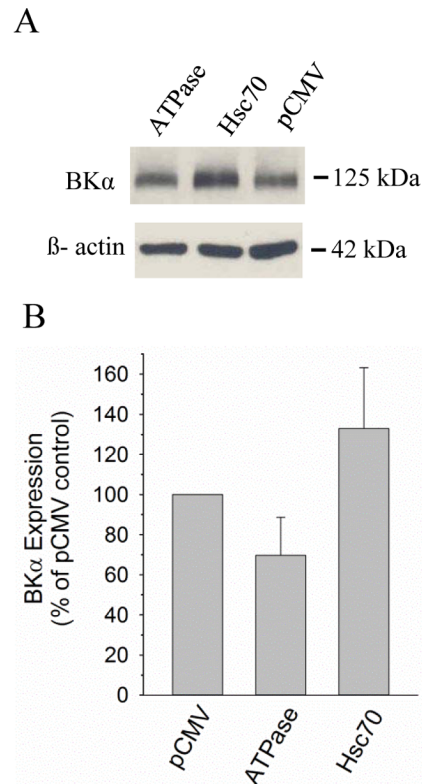

**Figure 5. Hsc70 does not reduce BK channel expression in the absence of CSP $\alpha$ .** **A.** CAD cells were transiently co-transfected with 1  $\mu$ g cDNA encoding BK $\alpha$  subunit and either 1  $\mu$ g HA-tagged, wild-type Hsc70 or the Hsc70 ATPase domain. Empty pCMV vector (1  $\mu$ g) was co-transfected with 1  $\mu$ g cDNA encoding BK $\alpha$  subunit as a transfection control. 24 h post-transfection, the cells were lysed and BK channel and  $\beta$ -actin expression was analyzed. **B.** The histogram quantifies the relative changes in cellular BK channel expression in the presence of WT Hsc70 and the Hsc70 ATPase domain, which were not statistically different than the control (i.e. pCMV vector alone). doi:10.1371/journal.pone.0086586.g005

expressing BK $\alpha$  subunit alone, or BK $\alpha$  along with either wild-type CSP $\alpha$  or the dysfunctional CSP $\alpha$  mutant CSP $\alpha$ <sub>HPD-AAA}. Following control recordings, cells were treated with the highly selective BK channel blocker penitrem A to isolate BK channel currents. The bottom row of traces in Figure 6A display the magnitude of BK channel-mediated, penitrem A-sensitive current observed under the three different transfection conditions. The current-voltage plot displayed in Figure 6B quantifies the effect of CSP $\alpha$  co-expression on BK channel current density. In the presence of wild-type CSP $\alpha$ , BK current density was significantly decreased compared with BK channel alone, whereas co-transfection with the loss-of-function CSP $\alpha$ <sub>HPD-AAA} led to a higher current density at very positive test pulse voltages. In parallel experiments, these observed CSP $\alpha$ -mediated changes in cell surface BK channel density and were confirmed by cell surface biotin labeling, followed by streptavidin pull-down and Western analysis (refer to inset). We have previously reported that CSP $\alpha$ <sub>HPD-AAA} did not alter the expression of other membrane-associated proteins (e.g. GAP43 and flotillin) [10]. Taken together, these data demonstrate that CSP $\alpha$  limits the expression of functional BK channels at the cell surface.</sub></sub></sub>

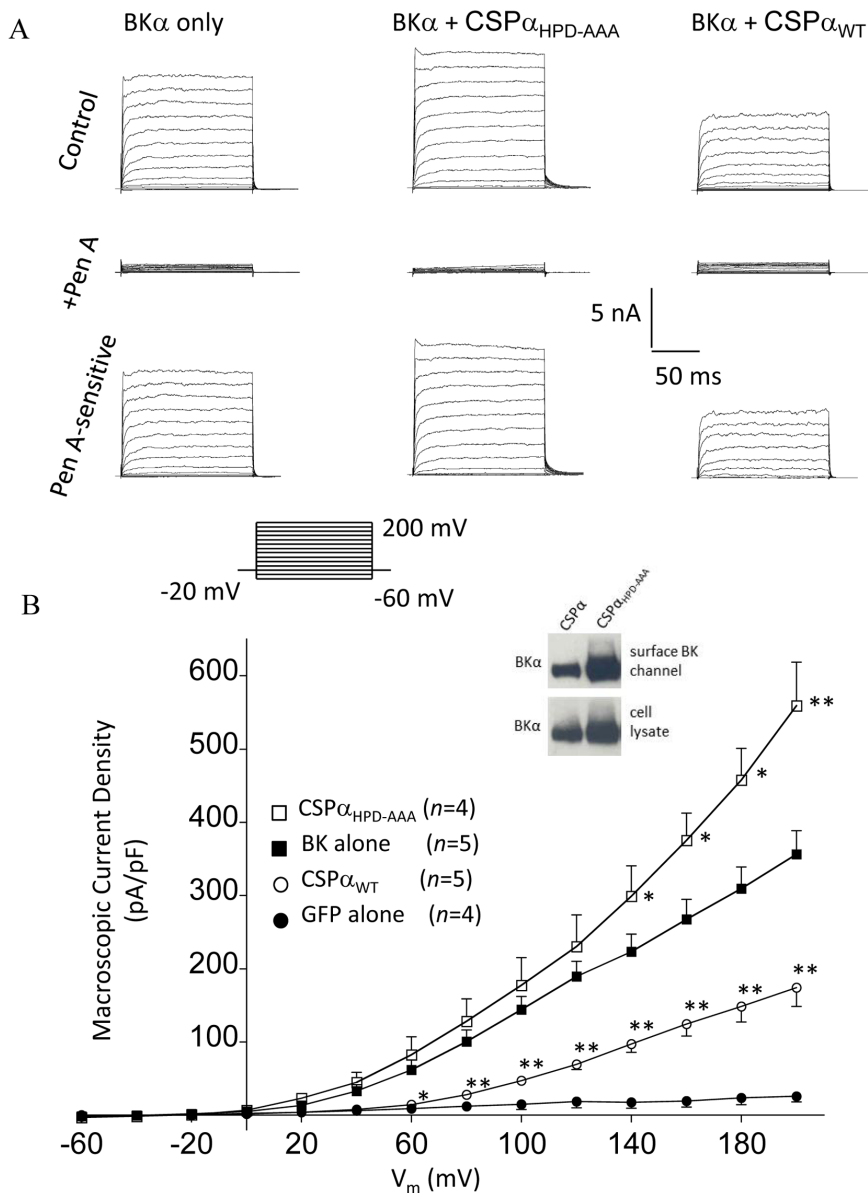

**Figure 6. CSP $\alpha$  co-expression alters BK channel whole cell current density in transiently transfected CAD cells.** (A) Representative recordings of single CAD cells voltage clamped as depicted in the protocol using the whole-cell configuration of the patch clamp technique. The left-hand column displays macroscopic BK channel currents recorded from CAD cells transiently-transfected with BK $\alpha$  subunits alone. The middle and right-hand columns display BK currents recorded from cells co-transfected either a CSP $\alpha$  mutant (i.e. CSP $\alpha_{\text{HPD-AAA}}$ ) or wild-type CSP $\alpha$ , respectively. Recordings were done 40–48 hours post-transfection. In all three conditions, whole cell currents were largely inhibited following addition of penitrem-A (100 nM). Penitrem-A sensitive currents, obtained by digital subtraction, are displayed in the bottom row of traces. The vertical and horizontal scale bars shown apply to all current tracings. The current-voltage plot shown in panel B quantifies the average penitrem A-sensitive peak currents observed under each transfection condition and highlights the significant differences in current density magnitude found between CAD cells transiently-transfected with BK $\alpha$  subunits alone, and those co-transfected with either WT or a mutant form of CSP $\alpha$  (Dunnett post-hoc ANOVA, one-way Vs BK channel alone; \* $p < 0.05$ , \*\* $p < 0.01$ ). Inset shows BK channel expression in CAD cells transiently co-transfected with 0.75  $\mu\text{g}$  cDNA encoding either CSP $\alpha$  or CSP $\alpha_{\text{HPD-AAA}}$ . For detection of surface expressed BK channel, transfected CAD cells were labeled for 30 min at 4°C with bath applied Biotin, as described in the methods. Following lysis, 1 mg of soluble protein lysate was subjected to overnight streptavidin pull-down at 4°C. Proteins isolated by streptavidin pull down (top panel) and 30  $\mu\text{g}$  of soluble cellular lysate (bottom panel) were analyzed by Western Blot with an anti-BK $\alpha$  subunit antibody. Data is representative of 3 similar experiments.  
doi:10.1371/journal.pone.0086586.g006

## Discussion

We have found that CSP $\alpha$ , a presynaptic neuroprotective chaperone, acts to significantly limit BK channel current and BK channel expression. The CSP $\alpha$ -mediated reduction in BK channels is dose- and time- dependent and the N terminal J-

domain of CSP $\alpha$  is essential for the noted decrease (Figures 1&3). Our earlier results reporting that loss/disruption of CSP $\alpha$  activity in either a knockout mouse or a neuronal cell line markedly increase BK channel expression [10] indirectly suggested that in the CNS, wild-type CSP $\alpha$  may function to limit cellular BK channel expression. In order to directly examine such an effect of

wild-type CSP $\alpha$ , we utilized an expression strategy to force an imbalance between BK channels and endogenous CSP $\alpha$ , thereby allowing BK channel protein to be present at elevated levels so that decreases in BK channel density induced by CSP $\alpha$  could be precisely monitored. Physiologically, BK channel activity is regulated by multiple mechanisms, including modulatory accessory subunits [17], alternative splicing [18], phosphorylation [19] and palmitoylation [20]. Data presented here suggest that the CSP $\alpha$ -mediated reduction in BK channel density occurs in a graded fashion that is dependent upon the relative expression between BK channels and CSP $\alpha$  (i.e. when BK channel expression is high, the cellular level of CSP $\alpha$  must also be elevated in order for a reduction to occur). While BK channel expression was reduced by CSP $\alpha$ , at low expression levels of BK channels, the CSP $\alpha$ -mediated reduction was minimal. These data thus provide evidence that wild-type CSP $\alpha$  normally acts to restrict neuronal BK channel expression.

It is possible that the CSP $\alpha$ -induced regulation of BK channel current represents a key event contributing to the CSP $\alpha$ -mediated synapse protection. By influencing membrane excitability and action potential firing, abnormal BK channel current density could be the trigger for the cascade of events leading to neurodegeneration in ANCL patients and the fulminant neurodegeneration observed in CSP $\alpha$ -KO mice. Nonetheless, association studies have identified several other synaptic proteins that are also likely clients for CSP $\alpha$  and may contribute to the neuropathology associated with the loss/dysfunction of CSP $\alpha$  [21–28]. Trafficking proteins in CSP $\alpha$  controlled pathways include t-SNARE protein SNAP25 (synaptosomal associated protein of 25 kDa), which is required for exocytosis, the GTPase dynamin1, which is essential for endocytosis, and  $\alpha$ -synuclein, which is implicated in synaptic vesicle function [7,29–32]. It will therefore be important to determine whether the increased BK channel expression observed in our studies reflects a membrane trafficking defect involving one or more these putative pathways associated with CSP $\alpha$  activity and degeneration. While the importance of CSP $\alpha$  in synapse protection is well established, the series of events underlying protection and degeneration cascades remains to be determined.

In conclusion, we provide evidence that the presynaptic chaperone, CSP $\alpha$ , limits BK channel density. We further speculate that elevated BK channel expression may be involved in the severe age-dependent [1] and activity-dependent degeneration [8,9] reported in the CNS and motor neurons of animal models displaying loss/dysfunction of CSP $\alpha$  [1,8,32,33].

## Materials and Methods

### Materials

CAD (CNS catecholaminergic derived) mouse neuroblastoma cells [34] were seeded into 6 well plates and grown in DMEM/F12 medium supplemented with 10% fetal bovine serum and 1% penicillin/streptomycin, as previously described [12]. Cells were lysed in 40 mM Tris (pH 7.4), 150 mM NaCl, 2 mM EDTA, 1 mM EGTA, 1 mM Na<sub>3</sub>VO<sub>4</sub>, 0.1% SDS, 1% Triton X-100, 0.5 mM PMSF and protease inhibitor (Sigma) at 4°C for 1 hour. Lysates were centrifuged at 15000 $\times$ g for 5 minutes at 4°C and the supernatant (soluble fraction) was collected and stored at  $-70^{\circ}$ C. For transient transfection, CAD cells were washed in PBS and transiently transfected using Lipofectamine-2000 (Invitrogen) in Opti-MEM. Protein concentration of the soluble CAD cell fraction was determined using the Bradford assay (BioRad).

### Immunoblotting

Proteins (30  $\mu$ g) were electro-transferred from SDS-polyacrylamide gels to nitrocellulose membrane (0.2  $\mu$ m pore size) in 20 mM Tris, 150 mM glycine and 12% methanol. Membranes were blocked in phosphate-buffered saline (PBS) containing 0.1% Tween 20, 4% skim milk powder and then incubated with primary antibody overnight at 4°C. The membranes were washed and incubated with horseradish peroxidase-coupled secondary antibody. The signal was developed using West Pico reagent (Pierce Biotechnology Inc.) and exposed to Kodak x-ray film. Bound antisera were quantified using a Biorad Fluor-S MultiImager Max and QuantityOne 4.2.1 software.

### Whole Cell Patch Clamp Recordings

Voltage-clamp measurements were performed using conventional, ruptured membrane patch clamp methodology in combination with an Axopatch 200B amplifier, Digidata 1440 series analogue/digital interface and pClamp v10 software. Whole cell electrical signals were typically filtered at 1–2 kHz and sampled at 5 kHz. Glass micropipettes (2–4 M $\Omega$  tip resistance) were pulled from thin-walled borosilicate capillaries and were filled with a solution containing 100 mM KOH, 30 mM KCl, 1 mM MgCl<sub>2</sub>, 0.005 mM CaCl<sub>2</sub>, 10 mM HEPES, pH 7.3 with methanesulfonic acid. The bath chamber was placed on the stage of Nikon TE2000 inverted microscope equipped with epifluorescence illumination and perfused with a modified Ringer's saline solution containing 135 mM NaCl, 5 mM KCl, 1 mM MgCl<sub>2</sub>, 2.5 mM CaCl<sub>2</sub>, 5 mM 4-aminopyridine and 10 mM HEPES, pH 7.3 with 1N NaOH. Cells in the bath chamber were constantly superfused at  $\sim$ 2 ml/min and solution changes were performed by gravity flow from a series of elevated solution reservoirs using manually controlled solenoid valves. All electrophysiological recordings were performed at 35–37°C. CAD cells seeded on 35 mm sterile plastic dishes were transiently transfected with separate pcDNA3.1-based constructs encoding BK $\alpha$  subunit, wild-type or mutant CSP $\alpha$ . A separate cDNA construct encoding enhanced GFP was included in all conditions as a fluorescent marker of transfection. Cells were transfected for 5–6 hours using Lipofectamine 2000 as the transfection reagent, and the total amount of cDNA added per dish was typically 1.8–2  $\mu$ g. Transfected cells were identified in the recording chamber by their green fluorescence using 488 nm excitation and 510 nm emission filters.

### Biotinylation of Cell Surface BK Channels

CAD cells transiently co-expressing murine brain BK $\alpha$  subunit [35] and CSP $\alpha$  variants were washed three times with PBS and incubated with EZ-Link Sulfo-NHS-SS Biotin (Thermo Scientific) (1  $\mu$ g/ml) in PBS for 30 min at 4°C. As a negative control, cells were incubated only with PBS. The reaction was neutralized by addition of 1% (w/v) BSA in PBS for 10 min at 4°C. After neutralization, cells were washed with ice-cold PBS to remove non-reacted biotin, and were harvested in 1ml of PBS containing 1% v/v Triton X-100 and protease inhibitor (complete, EDTA-free, Sigma) by an incubation for 2–5 minutes on ice. The lysates were centrifuged at 15,000 $\times$ g for 15 min at 4°C and the soluble protein concentration was determined using the Bradford assay (Bio Rad).

For streptavidin pull-down, 1 mg of the soluble protein lysate was incubated with 100  $\mu$ l streptavidin agarose beads (50% slurry) (Thermo Scientific) overnight at 4°C on a rotator. Beads were centrifuged at 3,000 $\times$ g and washed with 1% Triton X-100 in PBS. Following centrifugation, biotinylation proteins were eluted from the beads by adding 2 $\times$  Laemmli sample buffer (62.2 mM Tris HCl pH 6.8, 7.5% v/v Glycerol, 2% w/v SDS, 0.015 mM



Bromophenol Blue, 1.2% v/v  $\beta$ -Mercaptoethanol and 100 mM DTT) and incubated at 37°C for 1 h. Following elution, proteins were separated by SDS-PAGE.

## Acknowledgments

We thank Frank Vissner, Bob Winkfein, Sam Braun and Julien Donnelier for excellent technical support. We thank Peter McPherson for a RME8 construct.

## References

- Fernandez-Chacon R, Wolfel M, Nishimune H, Tabares L, Schmitz F, et al (2004) The synaptic vesicle protein CSP alpha prevents presynaptic degeneration. *Neuron* 42: 237–251.
- Braun JE, Scheller RH (1995) Cysteine string protein, a DnaJ family member, is present on diverse secretory vesicles. *Neuropharmacology* 34: 1361–1369.
- Velinov M, Dolzhanskaya N, Gonzalez M, Powell E, Konidari I, et al (2012) Mutations in the Gene DNAJC5 Cause Autosomal Dominant Kufs Disease in a Proportion of Cases: Study of the Parry Family and 8 Other Families. *PLoS ONE* 7: e29729.
- Noskova L, Stranecky V, Hartmannova H, Pristoupilova A, Baresova V, et al (2011) Mutations in DNAJC5, encoding cysteine-string protein alpha, cause autosomal-dominant adult-onset neuronal ceroid lipofuscinosis. *Am J Hum Genet* 89: 241–252.
- Benitez BA, Alvarado D, Cai Y, Mayo K, Chakraverty S, et al (2011) Exome-sequencing confirms DNAJC5 mutations as cause of adult neuronal ceroid-lipofuscinosis. *PLoS ONE* 6: e26741.
- Zinsmaier KE, Eberle KK, Buchner E, Walter N, Benzer S (1994) Paralysis and early death in cysteine string protein mutants of *Drosophila*. *Science* 263: 977–980.
- Chandra S, Gallardo G, Fernandez-Chacon R, Schluter OM, Sudhof TC (2005) Alpha-synuclein cooperates with CSPalpha in preventing neurodegeneration. *Cell* 123: 383–396.
- Garcia-Junco-Clemente P, Cantero G, Gomez-Sanchez L, Linares-Clemente P, Martinez-Lopez JA, et al (2010) Cysteine string protein-alpha prevents activity-dependent degeneration in GABAergic synapses. *J Neurosci* 30: 7377–7391.
- Schmitz F, Tabares L, Khimich D, Strenzke N, de la Villa-Polo P, et al (2006) CSPalpha-deficiency causes massive and rapid photoreceptor degeneration. *Proc Natl Acad Sci U S A* 103: 2926–2931.
- Kyle BD, Ahrendt E, Braun AP, Braun JE (2013) The Large Conductance, Calcium-activated K(+) (BK) Channel is regulated by Cysteine String Protein. *Sci Rep* 3: 2447.
- Swayne LA, Blattler C, Kay JG, Braun JEA (2003) Oligomerization characteristics of cysteine string protein. *Biochemical and Biophysical Research Communications* 300: 921–926.
- Xu F, Proft J, Gibbs S, Winkfein B, Johnson JN, et al (2010) Quercetin targets cysteine string protein (CSPalpha) and impairs synaptic transmission. *PLoS ONE* 5: e11045.
- Eisenberg E, Greene LE (2007) Multiple roles of auxilin and hsc70 in clathrin-mediated endocytosis. *Traffic* 8: 640–646.
- Zhao X, Braun AP, Braun JE (2008) Biological Roles of Neural J Proteins. *Cell Mol Life Sci* 65: 2385–2396.
- Braun JE, Wilbanks SM, Scheller RH (1996) The cysteine string secretory vesicle protein activates Hsc70 ATPase. *J Biol Chem* 271: 25989–25993.
- Walker VE, Wong MJ, Atanasiu R, Hantouche C, Young JC, et al (2010) Hsp40 chaperones promote degradation of the HERG potassium channel. *J Biol Chem* 285: 3319–3329.
- Shruti S, Urban-Ciecko J, Fitzpatrick JA, Brenner R, Bruchez MP, et al (2012) The brain-specific Beta4 subunit downregulates BK channel cell surface expression. *PLoS ONE* 7: e33429.
- Shipston MJ (2001) Alternative splicing of potassium channels: a dynamic switch of cellular excitability. *Trends Cell Biol* 11: 353–358.
- Schubert R, Nelson MT (2001) Protein kinases: tuners of the BKCa channel in smooth muscle. *Trends Pharmacol Sci* 22: 505–512.
- Shipston MJ (2011) Ion channel regulation by protein palmitoylation. *J Biol Chem* 286: 8709–8716. R110.210005.
- Nie Z, Ranjan R, Wenniger JJ, Hong SN, Bronk P, et al (1999) Overexpression of cysteine-string proteins in *Drosophila* reveals interactions with syntaxin. *J Neurosci* 19: 10270–10279.
- Sakisaka T, Meerlo T, Matteson J, Plutner H, Balch WE (2002) rab-alphaGDI activity is regulated by a Hsp90 chaperone complex. *EMBO* 21: 6125–6135.
- Maggia JM, Jarvis SE, Arnot MI, Zamponi GW, Braun JE (2000) Cysteine string protein regulates G-protein modulation of N-type calcium channels. *Neuron* 28: 195–204.
- Natochin M, Campbell TN, Barren B, Miller LC, Hameed S, et al (2005) Characterization of the G alpha(s) regulator cysteine string protein. *J Biol Chem* 280: 30236–30241.
- Leveque C, Pupier S, Marquize B, Geslin L, Kataoka M, et al (1998) Interaction of cysteine string proteins with the alpha1A subunit of the P/Q-type calcium channel. *Journal of Biological Chemistry* 273: 13488–13492.
- Gundersen CB, Umbach JA (1992) Suppression cloning of the cDNA for a candidate subunit of a presynaptic calcium channel. *Neuron* 9: 527–537.
- Boal F, Laguerre M, Milochau A, Lang J, Scotti PA (2011) A charged prominence in the linker domain of the cysteine-string protein Cspalpha mediates its regulated interaction with the calcium sensor synaptotagmin 9 during exocytosis. *FASEB J* 25: 132–143.
- Chen S, Zheng X, Schulze KL, Morris T, Bellen H, et al (2002) Enhancement of presynaptic calcium current by cysteine string protein. *J Physiol* 538: 383–389.
- Sharma M, Burre J, Sudhof TC (2011) CSPalpha promotes SNARE-complex assembly by chaperoning SNAP-25 during synaptic activity. *Nat Cell Biol* 13: 30–39.
- Sharma M, Burre J, Bronk P, Zhang Y, Xu W, et al (2011) CSPalpha knockout causes neurodegeneration by impairing SNAP-25 function. *EMBO J* 15: 829–841.
- Zhang YQ, Henderson MX, Colangelo CM, Ginsberg SD, Bruce C, et al (2012) Identification of CSPalpha Clients Reveals a Role in Dynamin 1 Regulation. *Neuron* 74: 136–150.
- Rozas JL, Gomez-Sanchez L, Mircheski J, Linares-Clemente P, Nieto-Gonzalez JL, et al (2012) Motorneurons Require Cysteine String Protein-alpha to Maintain the Readily Releasable Vesicular Pool and Synaptic Vesicle Recycling. *Neuron* 74: 151–165.
- Ruiz R, Casanas JJ, Sudhof TC, Tabares L (2008) Cysteine string protein-alpha is essential for the high calcium sensitivity of exocytosis in a vertebrate synapse. *Eur J Neurosci* 27: 3118–3131.
- Do T, Sun Q, Beuve A, Kuzhikandathil EV (2007) Extracellular cAMP inhibits D1 dopamine receptor expression in CAD catecholaminergic cells via A2a adenosine receptors. *J Neurochem* 101: 619–631.
- Butler A, Tsunoda S, McCobb DP, Wei A, Salkoff L (1993) mSlo, a complex mouse gene encoding “maxi” calcium-activated potassium channels. *Science* 261: 221–224.

## Author Contributions

Conceived and designed the experiments: JEAB APB. Performed the experiments: EA BK. Analyzed the data: EA BK JEAB APB. Contributed reagents/materials/analysis tools: JEAB APB. Wrote the paper: JEAB APB EA BK. Performed the biochemistry: EA. Performed the electrophysiology: BK.
